# Supplementary material
Source: PubMed Central journal article supplement (PMC3755262)
Supplement: NIHMS471014-supplement-1.pdf [file NIHMS471014-supplement-1.pdf]

## Supplementary data

### Two New Tryptophan Derivatives from the Seed Kernels of *Entada rheedei*: Effects on Cell Viability and HIV Infectivity

L. K. Nzowa<sup>a</sup>, R. B. Teponno<sup>a</sup>, L. A. Tapondjou<sup>a</sup>, L. Verotta<sup>b</sup>, Z. Liao<sup>c</sup>, D. Graham<sup>c</sup>, M.-C. Zink<sup>c</sup>,  
L. Barboni<sup>d,\*</sup>

<sup>a</sup> *Department of Chemistry, Faculty of Science, University of Dschang, Box 183, Dschang, Cameroon*

<sup>b</sup> *Department of Chemistry, University of Milan, C. Golgi 19, 20133 Milano, Italy*

<sup>c</sup> *Department of Molecular and Comparative Pathobiology, Johns Hopkins University School of Medicine, 733 N. Broadway, Suite 801, Baltimore, MD, USA, 21227*

<sup>d</sup> *School of Science and Technology, Chemistry Division, University of Camerino, Via S. Agostino 1, 62032 Camerino, Italy*

\*Corresponding author: Tel.: +390737402240; Fax: +390737402297; E-mail address:

luciano.barboni@unicam.it (L. Barboni)

## **List of contents**

- S1.  $^1\text{H}$  NMR (400 MHz,  $\text{CD}_3\text{OD}$ ) spectrum of compound **1**
- S2.  $^{13}\text{C}$  NMR (100 MHz,  $\text{CD}_3\text{OD}$ ) spectrum of compound **1**
- S3.  $^1\text{H}$  NMR (400 MHz,  $\text{CD}_3\text{OD}$ ) spectrum of compound **2**
- S4.  $^{13}\text{C}$  NMR (100 MHz,  $\text{CD}_3\text{OD}$ ) spectrum of compound **2**
- S5.  $^1\text{H}$  NMR (500 MHz,  $\text{C}_5\text{D}_5\text{N}$ ) spectrum of compound **3**
- S6.  $^{13}\text{C}$  NMR (125 MHz,  $\text{C}_5\text{D}_5\text{N}$ ) spectrum of compound **3**

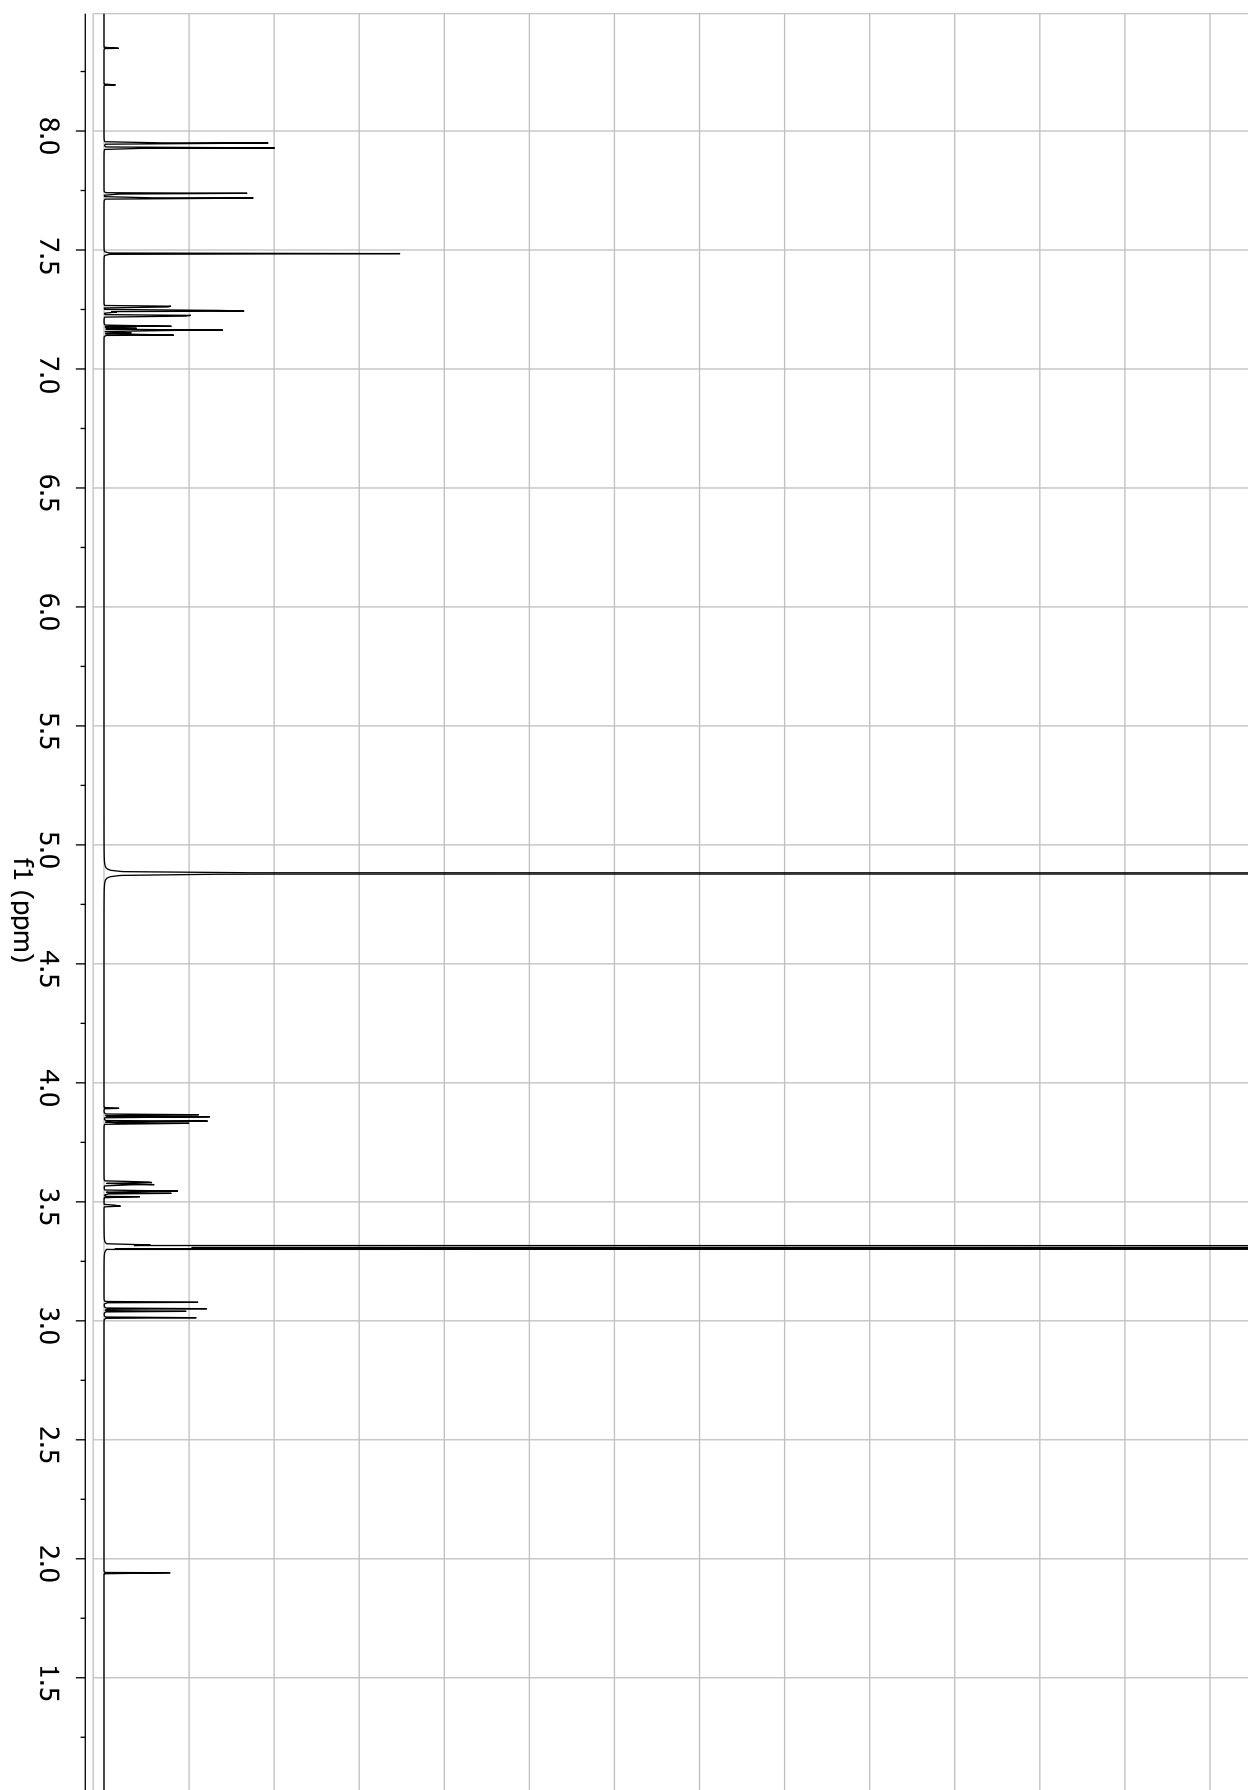

S1.  $^1\text{H}$  NMR (400 MHz,  $\text{CD}_3\text{OD}$ ) spectrum of compound **1**

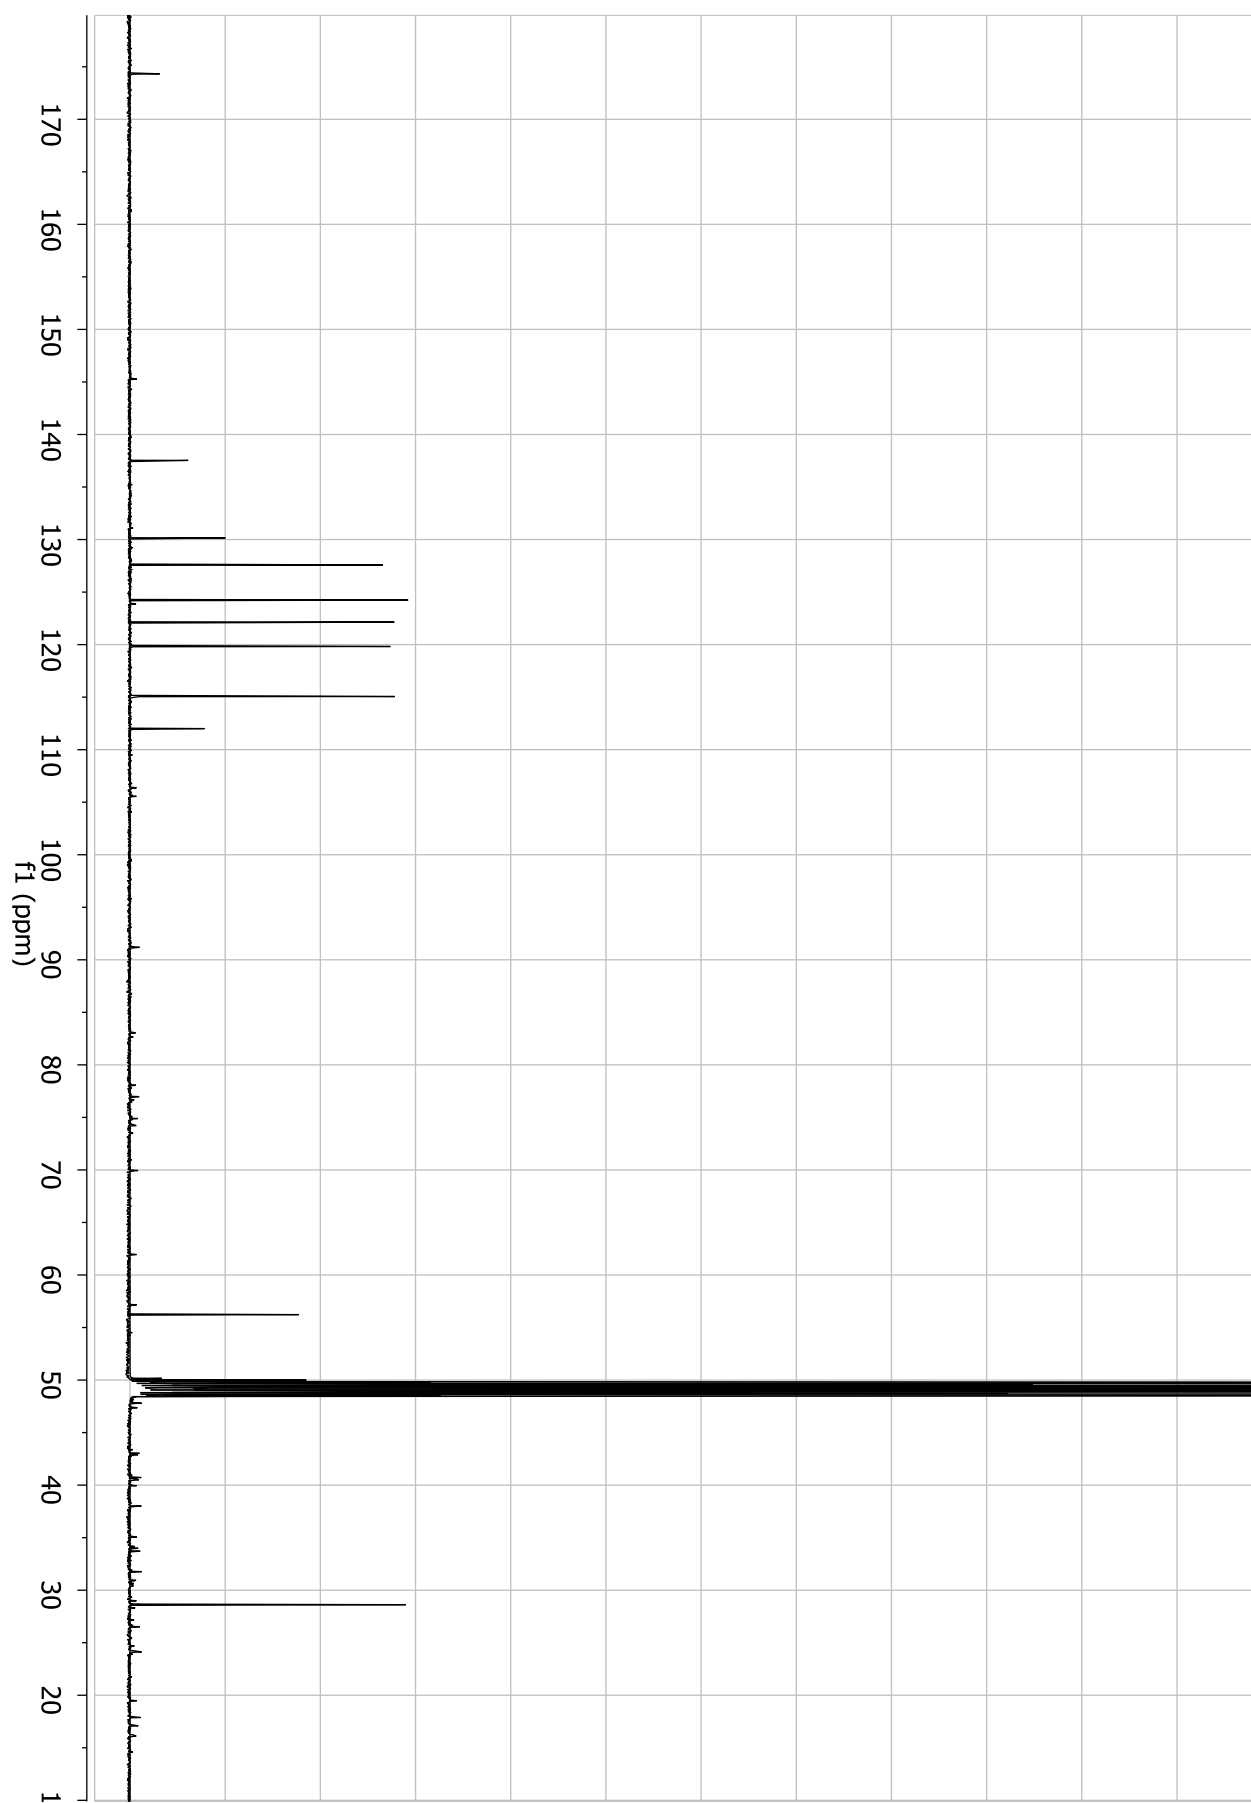

S2.  $^{13}\text{C}$  NMR (100 MHz,  $\text{CD}_3\text{OD}$ ) spectrum of compound **1**

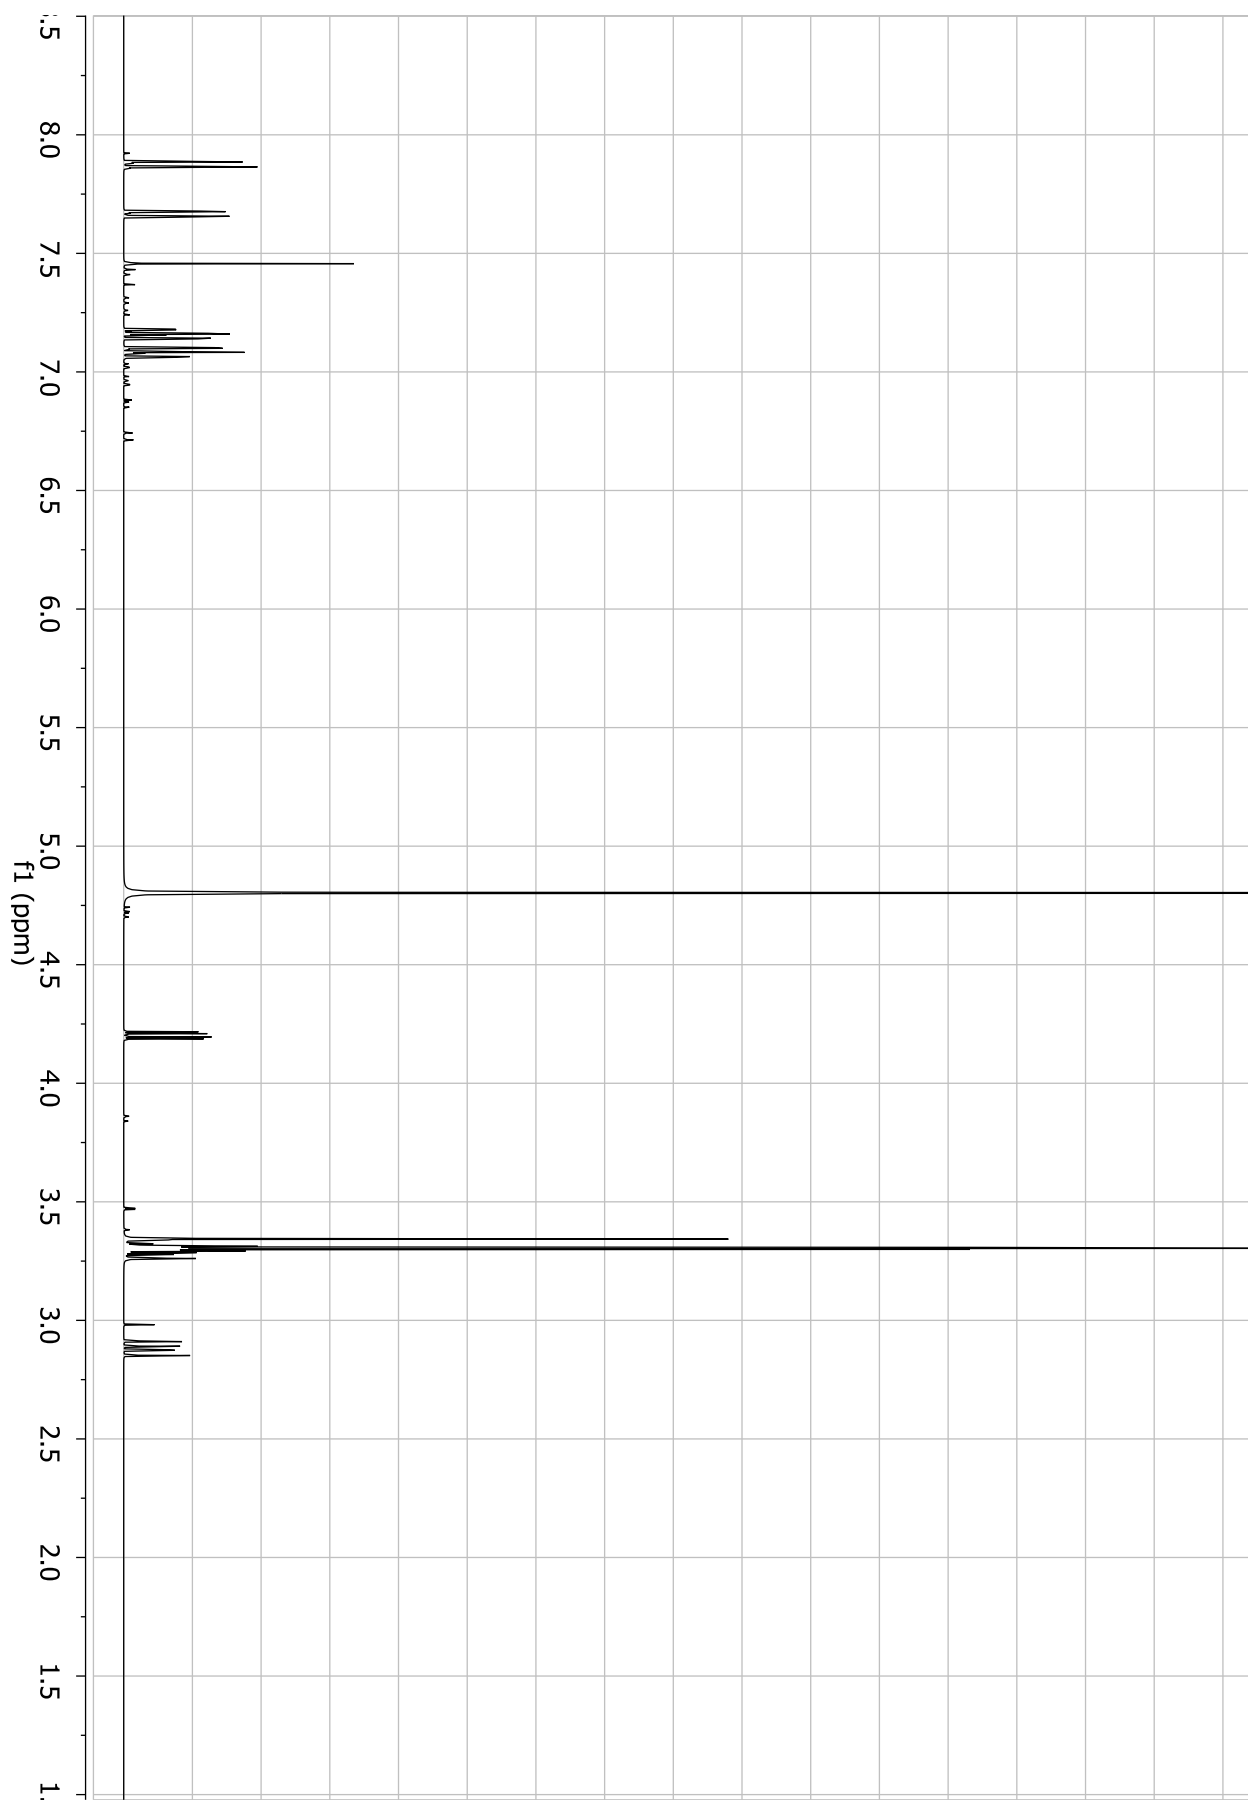

S3.  $^1\text{H}$  NMR (400 MHz,  $\text{CD}_3\text{OD}$ ) spectrum of compound 2

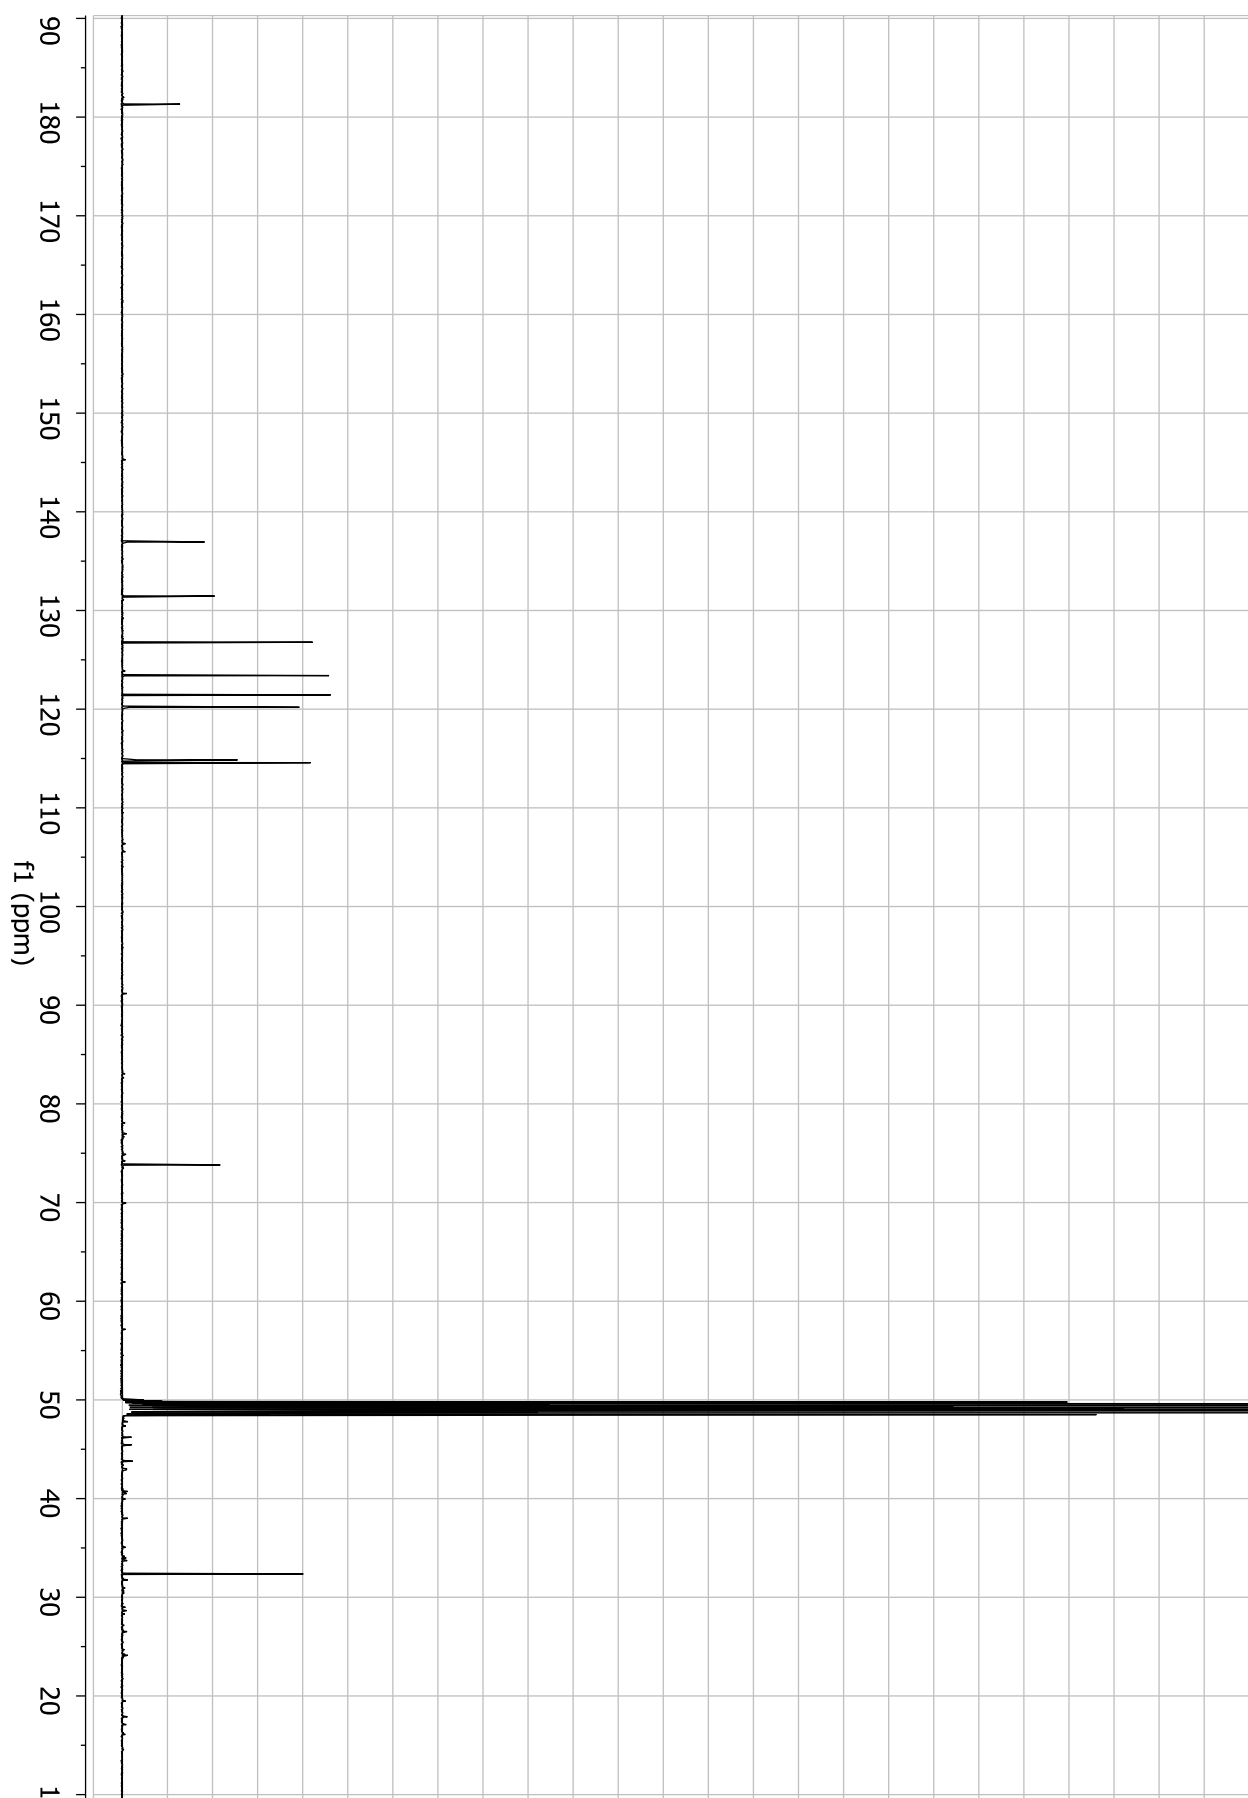

S4.  $^{13}\text{C}$  NMR (100 MHz,  $\text{CD}_3\text{OD}$ ) spectrum of compound 2

er18d.prsat  
Pulse Sequence: presat  
PULSE SEQUENCE presat  
DATE Jun 27 2006  
SOLVENT c5d5n  
PULSEPROG 1  
P1 500.880 MHz  
SPECTRAL WIDTH 7798.8 Hz  
ACQUISITION TIME 4.202 sec  
RELAXATION DELAY 5.000 sec  
PULSE WIDTH 10.0 usec  
TEMPERATURE 30.0 deg. C.  
NO. OF RELATIONS 16  
DATA PROCESSING  
RESOLUTION ENHANCEMENT -0.0 HZ  
FT SIZE 65536  
TOTAL ACQUISITION TIME 2 minutes

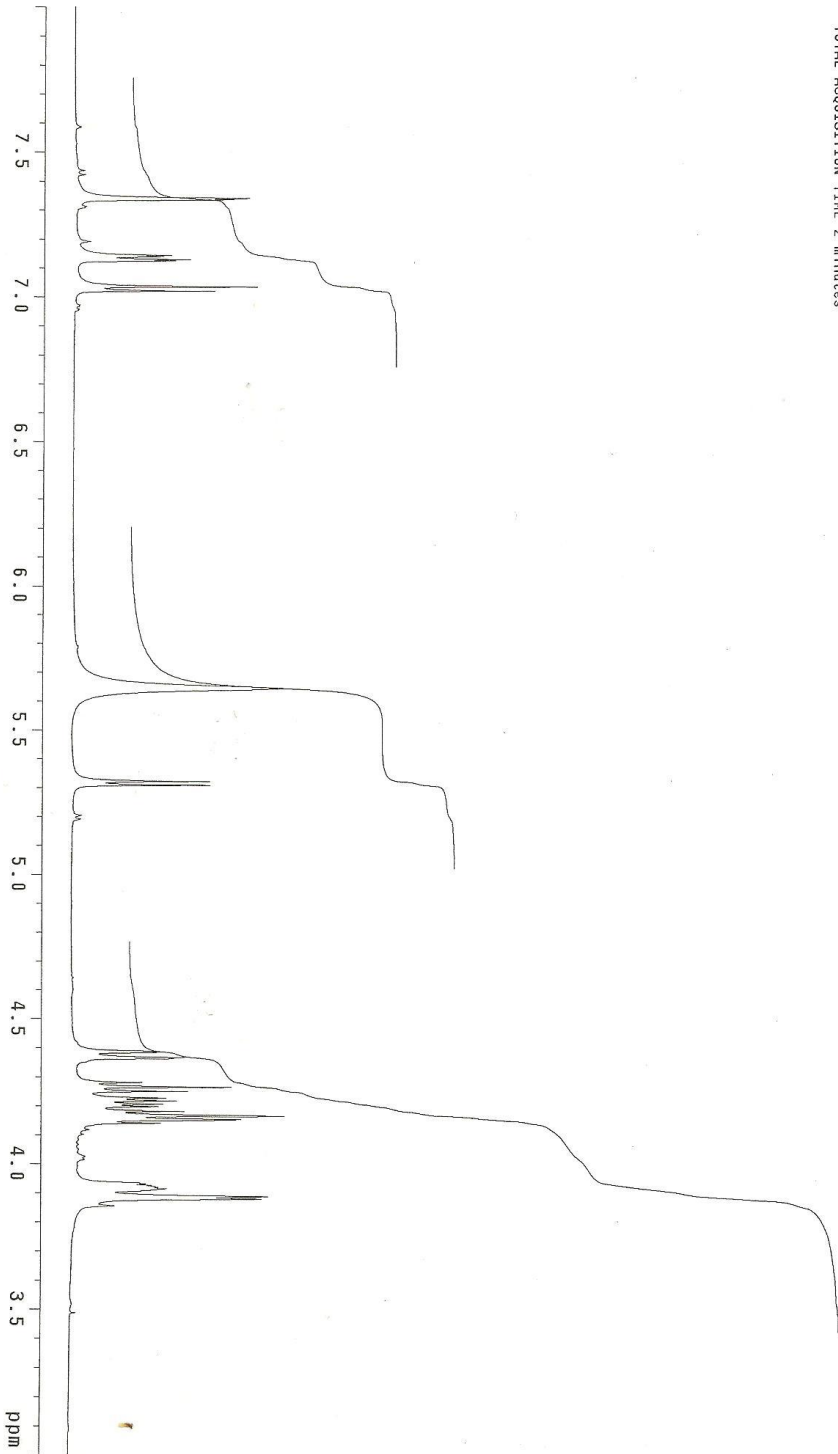

S5. <sup>1</sup>H NMR (500 MHz, C<sub>5</sub>D<sub>5</sub>N) spectrum of compound 3

er104.c13  
Pulse Sequence: bilevel  
PULSE SEQUENCE bilevel  
DATE Jun 27 2006  
SOLVENT C5D5N  
PULSE PROGRAM bilevel  
FREQ 150.854 MHz  
SPECTRAL WIDTH 36182.7 Hz  
ACQUISITION TIME 0.453 sec  
RELAXATION DELAY 1.547 sec  
PULSE WIDTH 7.9 usec  
TEMPERATURE 30.0 deg. C.  
NUC1 13C  
NUC2 15N  
DECPLPRG 11  
HIGH POWER 40  
DECPLPR CONTINUOUSLY ON  
GARP MODULATION  
DOUBLE PRECISION ACQUISITION  
DATA PROCESSING  
LINE BROADENING 1.0 Hz  
SAMPLING 1000  
TOTAL ACQUISITION TIME 49 minutes

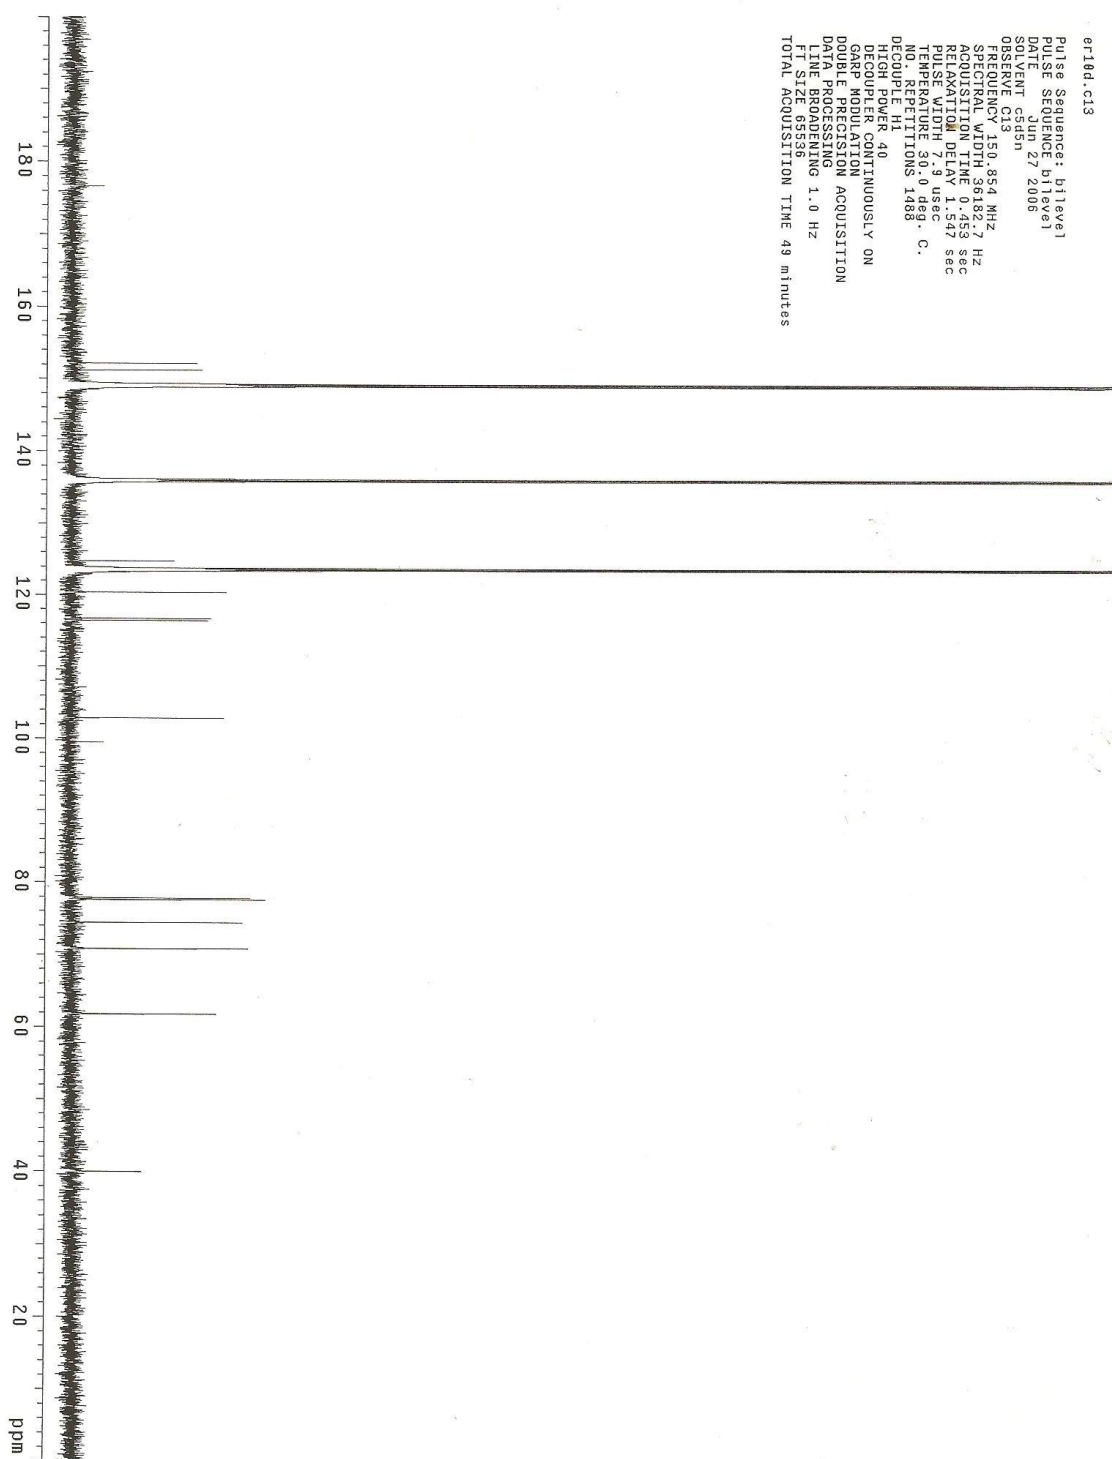

S6. <sup>13</sup>C NMR (125 MHz, C<sub>5</sub>D<sub>5</sub>N) spectrum of compound 3
